# Supplementary material for: Urchin-like hybrid nanostructures of CuOx/Fe2O3 from Cu-mediated pyrolysis of Fe-MOFs for catalytic reduction of organic pollutants
Source: Royal Society of Chemistry journal article supplement (doi:10.1039/d1nr06142a), 2021-12-17
Supplement: d1nr06142a1.pdf [file d1nr06142a1.pdf]

## Urchin-like hybrid nanostructures of CuO<sub>x</sub>/Fe<sub>2</sub>O<sub>3</sub> from Cu-mediated pyrolysis of Fe-MOFs for catalytic reduction of organic pollutants

Min Zhang<sup>a,b</sup>, Aihui Cao<sup>a,b</sup>, Heng Zhang<sup>a</sup>, Yunlong Zhao<sup>a</sup>, Xintai Su<sup>c,\*</sup>, Lu Wang<sup>a</sup>, Ronglan Wu<sup>a</sup>,

Chao Yang<sup>a,d,\*</sup>

[a] Ministry Key Laboratory of Oil and Gas Fine Chemicals, School of Chemical Engineering and Technology, Xinjiang University, Urumqi 830046, China

[b] State Key Laboratory of Structural Chemistry, Fujian Institute of Research on the Structure of Matter, Chinese Academy of Sciences (CAS), Fuzhou 350002, China

[c] Engineering and Technology Research Center for Environmental Nanomaterials, School of Environment and Energy, South China University of Technology, Guangzhou, 510006, China

[d] Xinjiang De'an Environmental Protection Technologies Inc, Urumqi 830046, China  
E-mail addresses: jerryyang1924@163.com (C. Yang); suxintai827@163.com (X. T. Su)

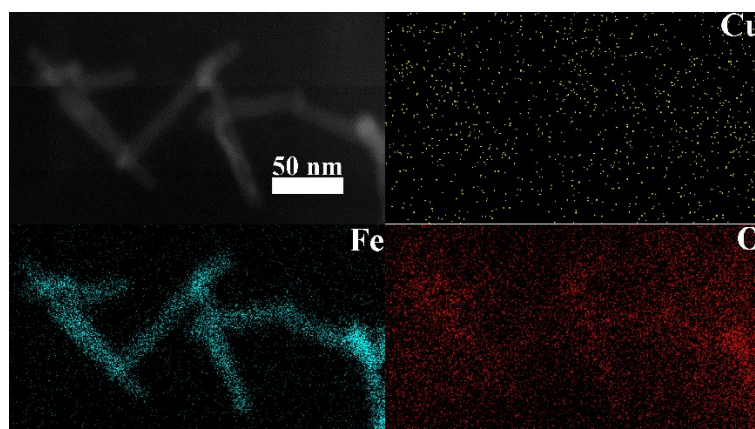

**Figure S1** STEM, and EDS mapping of nanorods from Urchin-like CuO<sub>x</sub>/Fe<sub>2</sub>O<sub>3</sub>.

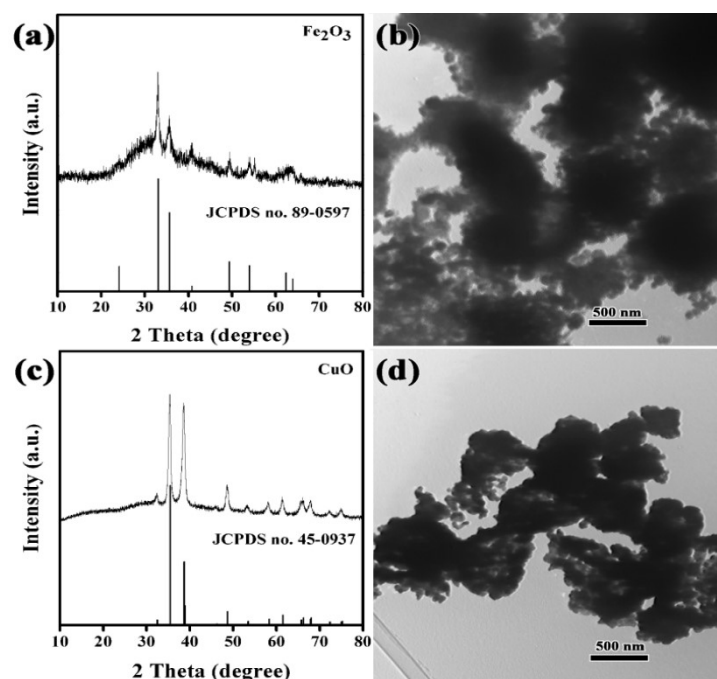

**Figure S2** XRD patterns and TEM images: (a, b)  $\text{Fe}_2\text{O}_3$  framework; (c, d) CuO nanocages.

(Synthesis of  $\text{Fe}_2\text{O}_3$  and CuO: MIL-101 (Fe), HKUST-1 was directly annealed at 350 °C in air for 2 h with a heating rate of 1 °C  $\text{min}^{-1}$ , respectively.)

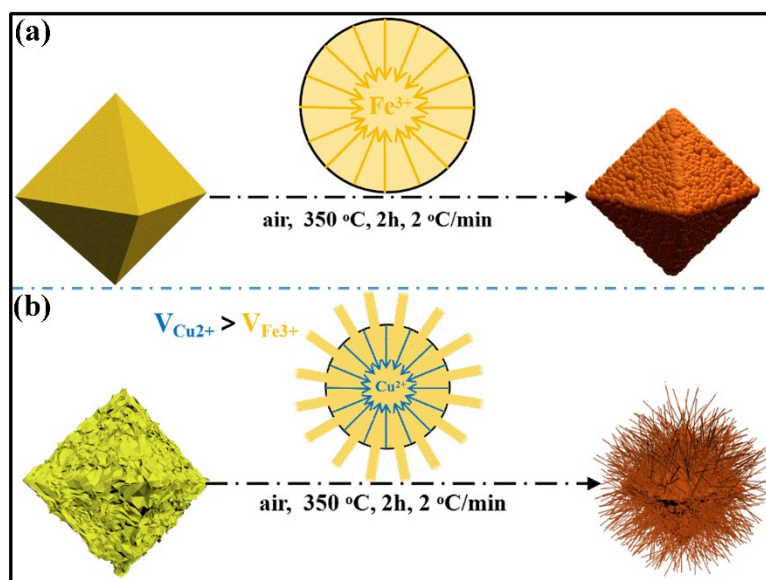

**Figure S3** Diagram of formation mechanism: (a) MIL-101-Fe derived  $\text{Fe}_2\text{O}_3$ ; (b)  $\text{Cu}(\text{NO}_3)_2/\text{MIL-101-Fe}$  derived  $\text{CuO}_x/\text{Fe}_2\text{O}_3$ .

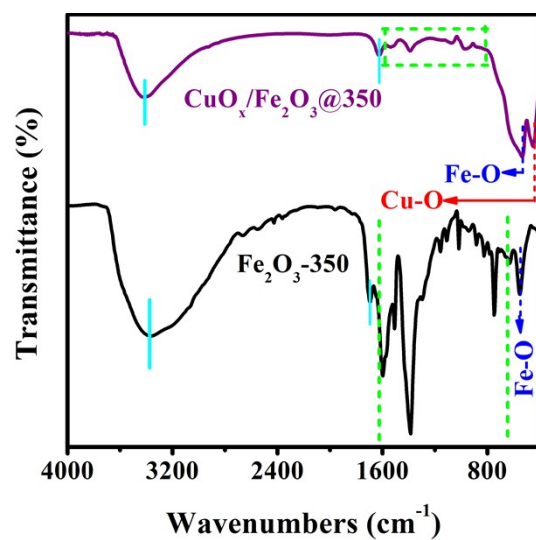

**Figure S4** FT-IR spectra of  $\text{CuO}_x/\text{Fe}_2\text{O}_3@350$  and  $\text{Fe}_2\text{O}_3@350$ .

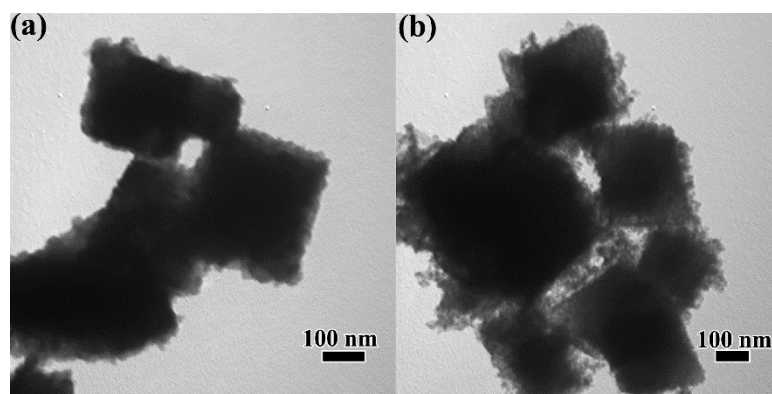

**Figure S5** TEM images: (a)  $\text{Ni}(\text{NO}_3)_2/\text{MIL-101-Fe}$  derived Ni-Fe Oxide; (b)  $\text{Co}(\text{NO}_3)_2/\text{MIL-101-Fe}$  derived Co-Fe Oxide.

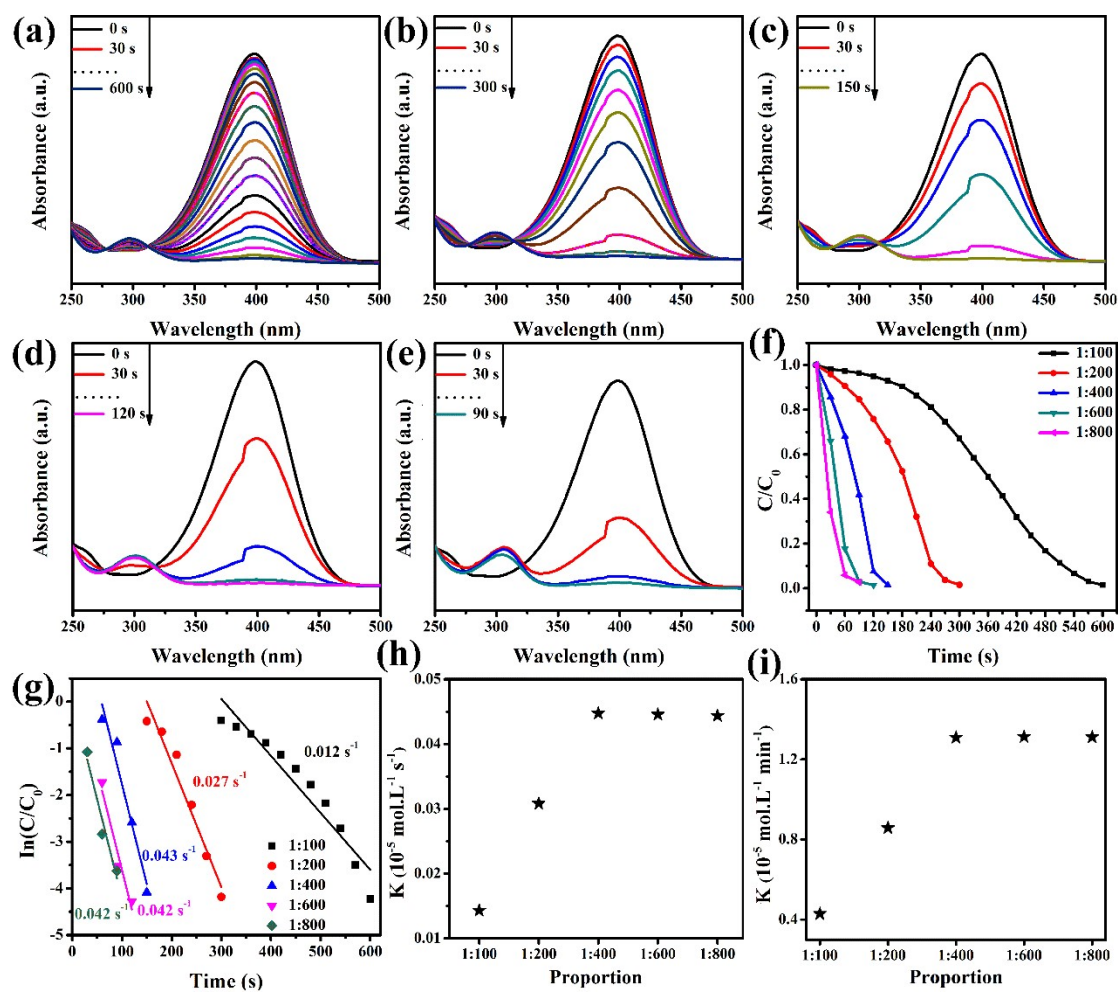

**Figure S6** The reduction of 4-NP by CuO<sub>x</sub>/Fe<sub>2</sub>O<sub>3</sub>@350 with different dose of NaBH<sub>4</sub>: (a-e) UV-vis spectra; (f) Plots of  $C/C_0$  vs  $t$ ; (g) plots of  $\ln(C/C_0)$  vs  $t$ ; (h, i) Plots of constant rate vs proportion of 4-NP to NaBH<sub>4</sub>.

Reduction conditions: 4-NP (3.0 mL, 0.12 mmol L<sup>-1</sup>), catalyst (30 μL, 0.5 mg mL<sup>-1</sup>), and temperature (298.15 K).

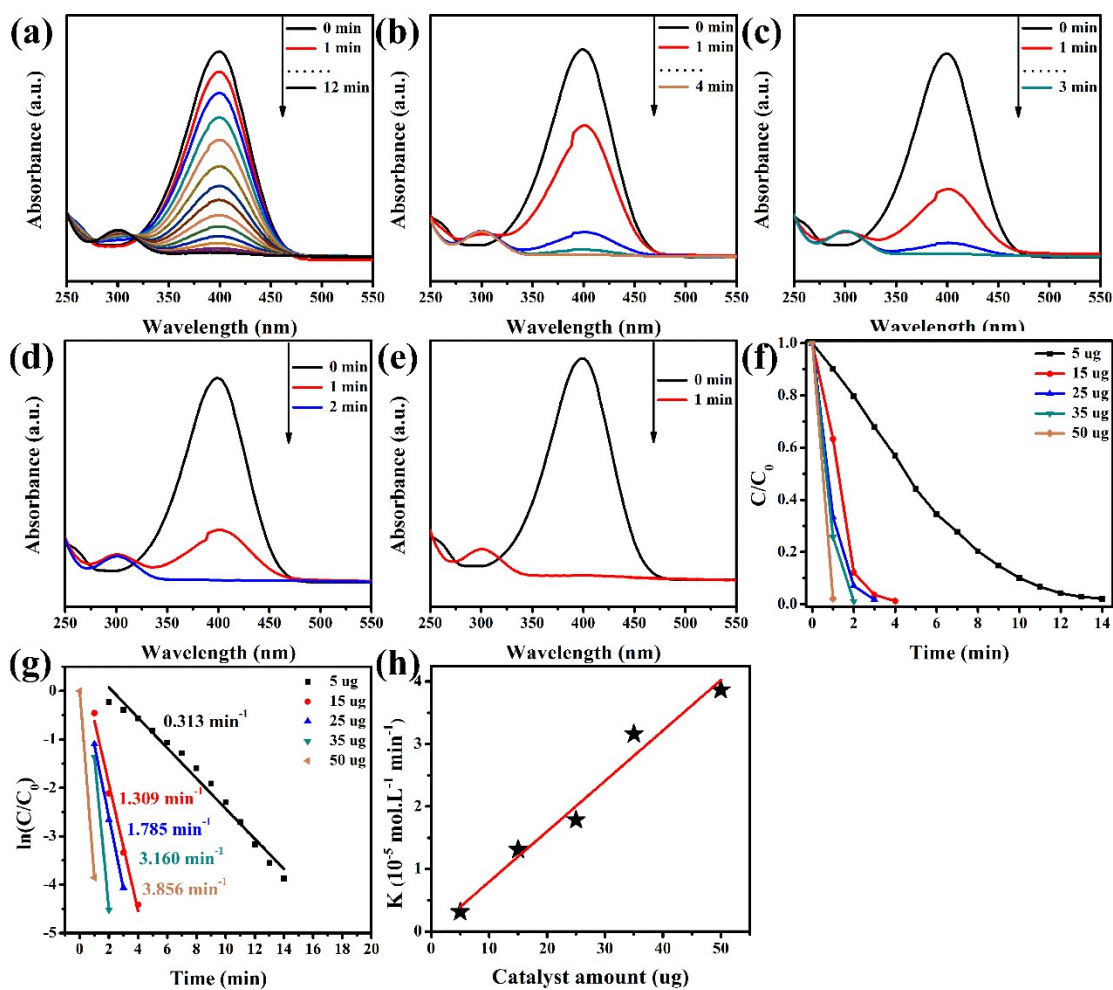

**Figure S7** The reduction of 4-NP to 4-AP over different dose of  $\text{CuO}_x/\text{Fe}_2\text{O}_3@350$ : (a-e) UV-vis spectra; (f) Plots of  $C/C_0$  vs  $t$ ; (g) Plots of  $\ln(C/C_0)$  vs  $t$ ; (h) Plots of constant rate vs catalyst dosage.

Reduction conditions: 4-NP ( $3.0 \text{ mL}$ ,  $0.12 \text{ mmol L}^{-1}$ ), catalyst ( $0.5 \text{ mg mL}^{-1}$ ),  $\text{NaBH}_4$  ( $0.12 \text{ mmol}$ ), and temperature ( $298.15 \text{ K}$ ).

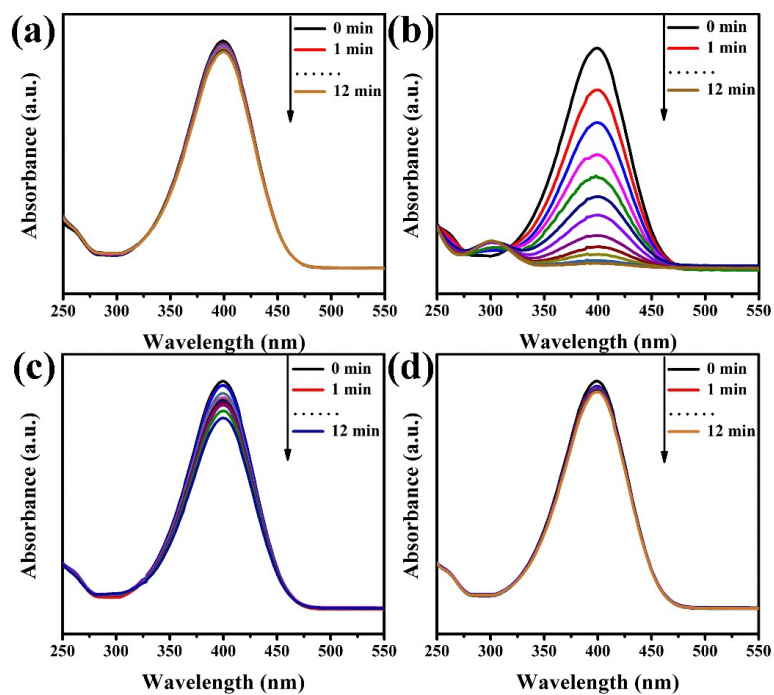

**Figure S8** UV-vis spectra of reduction of 4-NP over  $\text{CuO}_x/\text{Fe}_2\text{O}_3$  derived from  $\text{Cu}(\text{NO}_3)_2/\text{MIL-101-Fe}$  at different temperature: (a) 300 °C; (b) 350 °C; (c) 400 °C; (d) 450 °C.

Reduction conditions: 4-NP (3.0 mL, 0.12 mmol L<sup>-1</sup>), catalyst (10 μL, 0.5 mg mL<sup>-1</sup>),  $\text{NaBH}_4$  (0.12 mmol), and temperature (298.15 K).

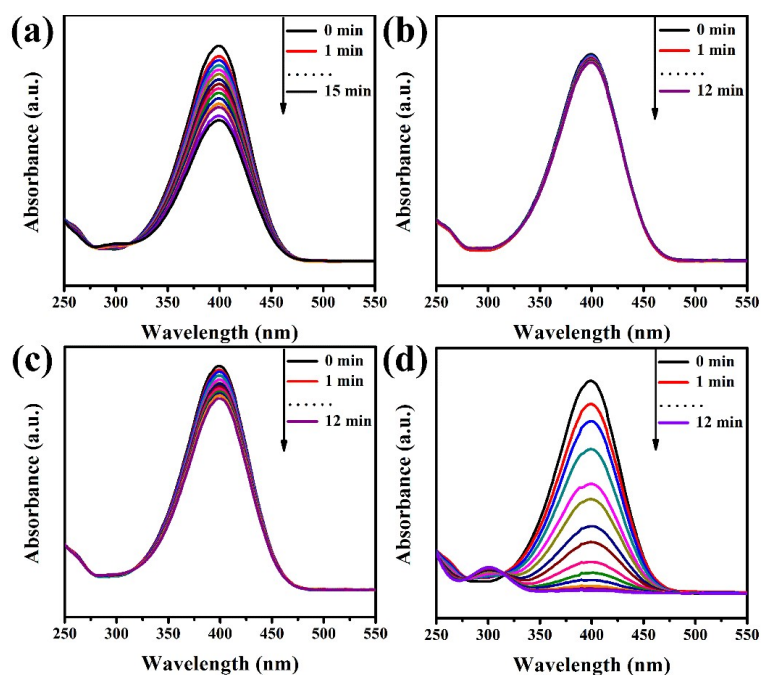

**Figure S9** UV-vis spectra of reduction of 4-NP over different component catalyst: (a) CuO nanocage; (b)  $\text{Fe}_2\text{O}_3$ ; (c) mixture of CuO+ $\text{Fe}_2\text{O}_3$ ; (d)  $\text{CuO}_x/\text{Fe}_2\text{O}_3@350$ .

Reduction conditions: 4-NP (3.0 mL,  $0.12 \text{ mmol L}^{-1}$ ), catalyst ( $10 \mu\text{L}$ ,  $0.5 \text{ mg mL}^{-1}$ ),  $\text{NaBH}_4$  ( $0.12 \text{ mmol}$ ), and temperature ( $298.15 \text{ K}$ ).

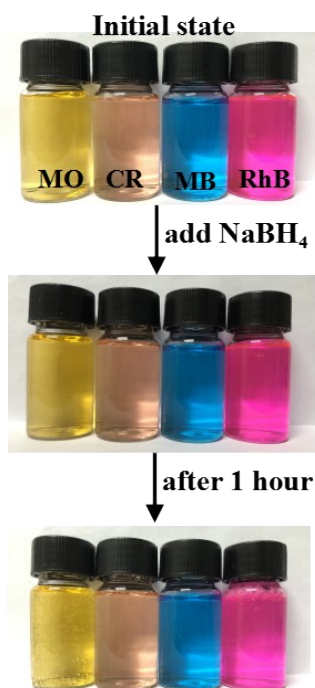

**Figure S10** Photograph of dye molecules before and after addition of  $\text{NaBH}_4$  without catalysts.

**Table S1** Comparison of catalytic results for the reduction of 4-NP by  $\text{NaBH}_4$  in the

presence of various catalysts.

| Catalysts                                             | 4-NP  | NaBH <sub>4</sub>    | <i>Kinetic rate</i>                         | <i>Ratio</i>                                  | <i>Turnover frequency</i> | <i>Reference</i> |
|-------------------------------------------------------|-------|----------------------|---------------------------------------------|-----------------------------------------------|---------------------------|------------------|
|                                                       | (mM)  | (M)×10 <sup>-2</sup> | <i>constant</i>                             | <i>constant</i>                               | TOF (h <sup>-1</sup> )    |                  |
|                                                       |       |                      | <i>K<sub>app</sub></i> (min <sup>-1</sup> ) | <i>K</i> (min <sup>-1</sup> g <sup>-1</sup> ) |                           |                  |
| CuO <sub>x</sub> /Fe <sub>2</sub> O <sub>3</sub> @350 | 0.12  | 4.8                  | 0.3122                                      | 6.244×10 <sup>4</sup>                         | 574.5                     | <b>this work</b> |
| Ag-OMS-C                                              | 0.1   | 0.01                 | 1.8                                         | 9.000×10 <sup>3</sup>                         | 90.2                      | [S1]             |
| Pd/C                                                  | 1.67  | 120                  | 0.52980                                     | 6.915×10 <sup>2</sup>                         | 82.8                      | [S2]             |
| Pt nanotubes                                          | 0.09  | 10                   | 0.2                                         | 13.3                                          |                           | [S3]             |
| PdPt nanotubes                                        | 0.09  | 10                   | 0.5                                         | 33                                            |                           | [S3]             |
| Au                                                    | 0.103 | 1                    | 0.126                                       | 21                                            | 0.00046                   | [S4]             |

The TOF is calculated by moles of reduced 4-NP molecules per mole copper of catalyst per hour.

## Reference

S1 H.-T. Fan, X.-G. Liu, X.-J. Xing, B. Li, K. Wang, S.-T. Chen, Z. Wu and D.-F. Qiu,

*Dalton Transactions* 2019, **48**, 2692-2700.

S2 Y. Fang and E. Wang, *Nanoscale* 2013, **5**, 1843-1848.

S3 Y. Wang, Q. Li, P. Zhang, D. O'Connor, R. S. Varma, M. Yu, and D. Hou, *J. Colloid*

*Interface Sci.* 2019, **539**, 161-167.



[S4] M. H. Rashid, R. R. Bhattacharjee, A. Kotal, and T. K. Mandal, *Langmuir* 2006, **22**, 7141-7143.
